# Supplementary material for: Aggregation-induced phosphorescence emission (AIPE) behaviors in PtII(C^N)(N-donor ligand)Cl-type complexes through restrained D2d deformation of the coordinating skeleton and their optoelectronic properties
Source: Royal Society of Chemistry journal article supplement (doi:10.1039/d0tc05527a), 2021-01-01
Supplement: d0tc05527a1.pdf [file d0tc05527a1.pdf]

**Electronic Supplementary Information**

**Aggregation-Induced Phosphorescent Emission (AIPE) Behaviors in  
Pt<sup>II</sup>(C<sup>^</sup>N)(N-donor ligand)Cl-type Complexes Through Restrained *D*<sub>2d</sub>  
Deformation of the Coordinating Skeleton and Their Optoelectronic  
Properties**

Hua Yang,<sup>a</sup> Huiying Li,<sup>a</sup> Ling Yue,<sup>a</sup> Xi Chen,<sup>a</sup> Dongdong Song,<sup>a</sup> Xiaolong Yang,<sup>a</sup> Yuanhui Sun,<sup>a</sup>  
Guijiang Zhou,<sup>a\*</sup> and Zhaoxin Wu<sup>a</sup>

<sup>a</sup> *School of Chemistry, MOE Key Laboratory for Nonequilibrium Synthesis and Modulation of Condensed Matter, State Key Laboratory for Mechanical Behavior of Materials, Xi'an Jiaotong University, Xi'an 710049, P. R. China.*

<sup>b</sup> *Key Laboratory for Physical Electronics and Devices of the Ministry of Education, Faculty of Electronic and Information Engineering, Xi'an Jiaotong University, Xi'an 710049, P. R. China.*

## Contents

|           |                                                                                                                                                              |     |
|-----------|--------------------------------------------------------------------------------------------------------------------------------------------------------------|-----|
| Scheme S1 | Synthetic scheme for the C <sup>^</sup> N-type ligands.                                                                                                      | S4  |
| Scheme S2 | Synthetic scheme for the N-donor ligands.                                                                                                                    | S5  |
| Fig. S1   | <sup>1</sup> H NMR spectra for these Pt <sup>II</sup> (C <sup>^</sup> N)(N-donor ligand)Cl-type complexes.                                                   | S9  |
| Fig. S2   | <sup>13</sup> C NMR spectra for these Pt <sup>II</sup> (C <sup>^</sup> N)(N-donor ligand)Cl-type complexes.                                                  | S14 |
| Fig. S3   | The TGA curves for these Pt <sup>II</sup> (C <sup>^</sup> N)(N-donor ligand)Cl-type complexes.                                                               | S14 |
| Fig. S4   | Photoluminescent spectra for these Pt <sup>II</sup> (C <sup>^</sup> N)(N-donor ligand)Cl-type complexes at 77K.                                              | S15 |
| Fig. S5   | Particle size distribution of these Pt <sup>II</sup> (C <sup>^</sup> N)(N-donor ligand)Cl-type obtained from the THF : H <sub>2</sub> O mixture at $f_w^c$ . | S16 |
| Fig. S6   | CV carves for <b>A1</b> , <b>B1</b> , <b>C1</b> , <b>A2</b> , <b>B2</b> , <b>C2</b> , <b>A3</b> , <b>B3</b> and <b>C3</b>                                    | S17 |
| Fig. S7   | Current density–voltage–luminance (J–V–L) relationships of the OLEDs.                                                                                        | S18 |
| Fig. S8   | EL efficiencies vs. luminance curves for the OLEDs.                                                                                                          | S19 |

**Procedures for the Synthesis of C<sup>N</sup>-type ligands**

Synthetic scheme for C<sup>N</sup>-type ligands are shown in Scheme S1. Under the N<sub>2</sub> atmosphere, 1-naphthaleneboronic acid, 2-naphthaleneboronic acid or 9,9-diethyl-9H-fluorene-2-boronic acid (1.0 equiv.), 2-bromopyridine (1.2 equiv.) and Pd(PPh<sub>3</sub>)<sub>4</sub> (5 mol%) were heated to 110 °C in a mixture of 5 mL of 2M K<sub>2</sub>CO<sub>3</sub> and 15 mL of degassed THF for 12 h. After cooling to room temperature, the mixture was extracted with dichloromethane, the organic phase was dried with Na<sub>2</sub>SO<sub>4</sub>, and the solvent was removed under reduced pressure. The residue was obtained as a crude product, which was chromatographed on a silica column to produce the pure product.<sup>1,2</sup>

**L-1:** yellowish oil; yield: 78%. <sup>1</sup>H NMR (300 MHz, CDCl<sub>3</sub>, δ): 8.79 (dd, *J* = 4.8, 1.7 Hz, 1 H), 8.08 (dd, *J* = 7.1, 2.9 Hz, 1 H), 7.91 (d, *J* = 8.1, 2 H), 7.82 (dt, *J* = 7.7, 1.7 Hz, 1 H), 7.56 (m, 5H), 7.33 (ddd, *J* = 7.7, 4.8, 1.1 Hz, 1 H). <sup>13</sup>C NMR (75 MHz, CDCl<sub>3</sub>, δ): 159.5, 149.7, 138.7, 136.5, 134.2, 131.4, 129.0, 128.5, 127.6, 126.6, 126.0, 125.8, 125.4, 125.2, 122.1.

**L-2:** white solid; yield: 71%. <sup>1</sup>H NMR (300 MHz, CDCl<sub>3</sub>, δ): 8.75 (d, *J* = 4.2 Hz, 1 H), 8.49 (s, 1H), 8.14 (dd, *J* = 8.6, 1.5 Hz, 1 H), 7.90 (m, 4H), 7.80 (td, *J* = 7.5, 1.8 Hz, 1 H), 7.50 (m, 2H), 7.26 (dd, *J* = 7.5, 4.2 Hz, 1 H). <sup>13</sup>C NMR (75 MHz, CDCl<sub>3</sub>, δ): 157.3, 149.7, 136.7, 133.5, 133.4, 128.6, 128.3, 127.6, 126.4, 126.2, 124.5, 122.1, 120.7.

**L-3:** white solid; yield: 77%. <sup>1</sup>H NMR (300 MHz, CDCl<sub>3</sub>, δ): d 8.71 (dd, *J* = 0.8, 4.9 Hz, 1 H), 8.06 (d, *J* = 1.6 Hz, 1H), 7.59 (dd, *J* = 1.6, 7.8 Hz, 1H), 7.78–7.61 (m, 4H), 7.33–7.29 (m, 3H), 7.15–7.10 (m, 1H), 2.17–1.99 (m, 4H), 0.35 (t, *J* = 7.3 Hz, 6H). <sup>13</sup>C NMR (75 MHz, CDCl<sub>3</sub>, δ): 157.38, 150.20, 150.10, 149.30, 142.23, 140.71, 137.93, 136.36, 127.10, 126.63, 125.62, 122.66, 121.58, 121.02, 120.29, 119.71, 119.59, 56.15, 32.68, 8.55.

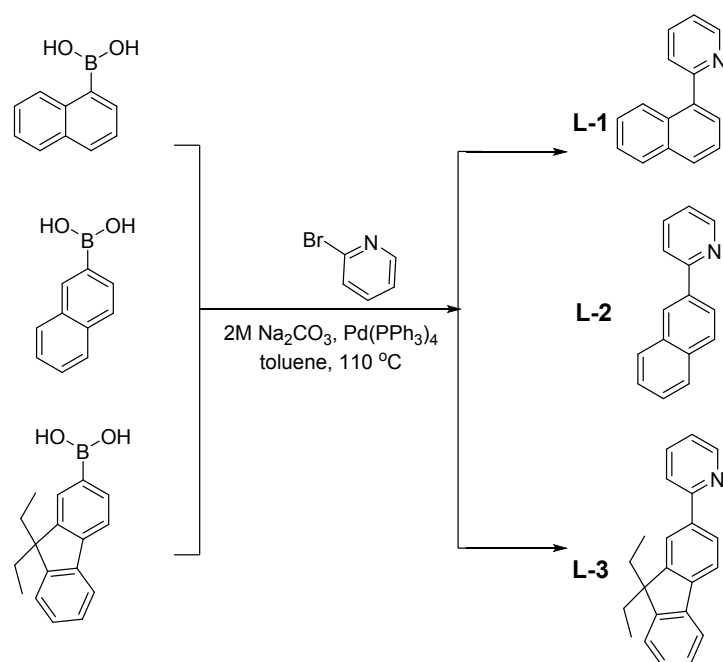

Scheme S1 Synthetic scheme for the C<sup>N</sup>-type ligands.

### Procedures for the Synthesis of N-Donor Ligands

Synthetic scheme for N-donor ligands are shown in Scheme S2. Under the N<sub>2</sub> atmosphere, the corresponding borate compound or boronic acid (1.0 equiv.), pyridine-4-boronic acid (1.2 equiv.) and Pd(PPh<sub>3</sub>)<sub>4</sub> (5 mol%) were heated to 110 °C in a mixture of 5 mL of 2M K<sub>2</sub>CO<sub>3</sub> and 15 mL of degassed THF for 12 h. After cooling to room temperature, the mixture was extracted with dichloromethane, the organic phase was dried with Na<sub>2</sub>SO<sub>4</sub>, and the solvent was removed under reduced pressure. The residue was obtained as a crude product, which was chromatographed on a silica column to produce the pure product.<sup>3,4</sup>

**N2**: white solid; yield: 78%. <sup>1</sup>H NMR (500 MHz, CDCl<sub>3</sub>, δ): 8.68 (d, *J* = 5.5 Hz, 2H), 7.72 (s, 4H), 7.64 (d, *J* = 7.3 Hz, 2H), 7.56 (d, *J* = 6.0 Hz, 2H), 7.48 (dd, *J* = 7.6, 7.6 Hz, 2H), 7.39 (t, *J* = 7.4 Hz, 1H). <sup>13</sup>C NMR (75 MHz, CDCl<sub>3</sub>, δ): 150.2, 148.1, 142.1, 140.3, 136.9, 129.0, 127.9, 127.8, 127.5, 127.2, 121.6.

**N3**: white solid; yield: 68%. <sup>1</sup>H NMR (400 MHz, CDCl<sub>3</sub>, δ): 8.76-8.72 (m, 2H), 8.20-8.14 (m, 2H), 7.90-7.85 (m, 2H), 7.74- 7.69 (m, 2H), 7.62-7.59 (m, 2H), 7.50-7.41 (m, 4H), 7.35-7.30 (m, 2H). <sup>13</sup>C NMR (75 MHz, CDCl<sub>3</sub>, δ): 150.6, 147.5, 140.8, 138.8, 137.2, 128.6, 127.7, 126.2, 123.7, 121.7, 120.6, 120.4, 109.9.

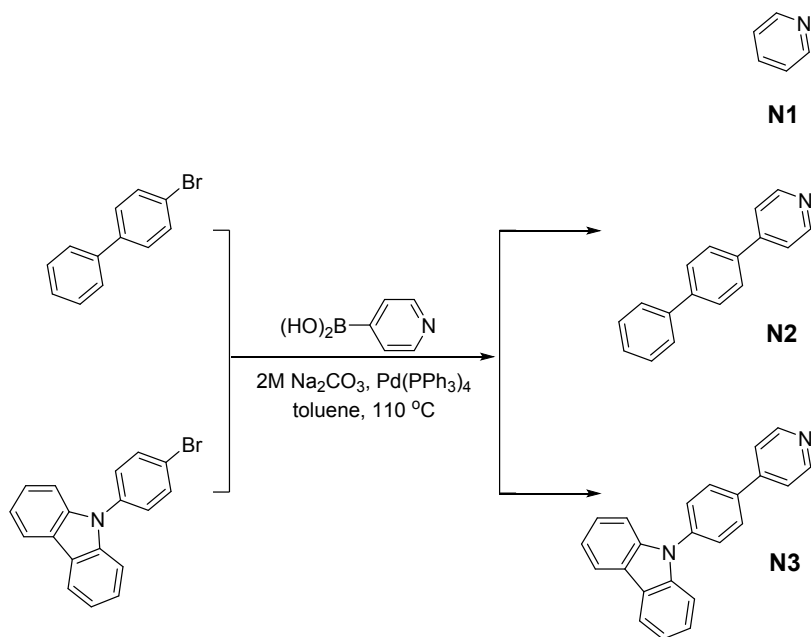

Scheme S2 Synthetic scheme for the N-donor ligands.

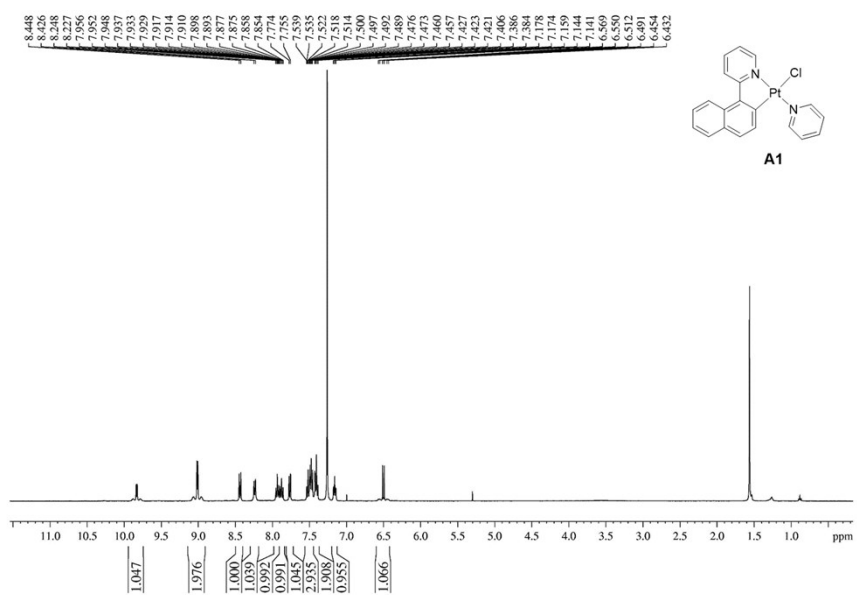

Electronic Supplementary Information

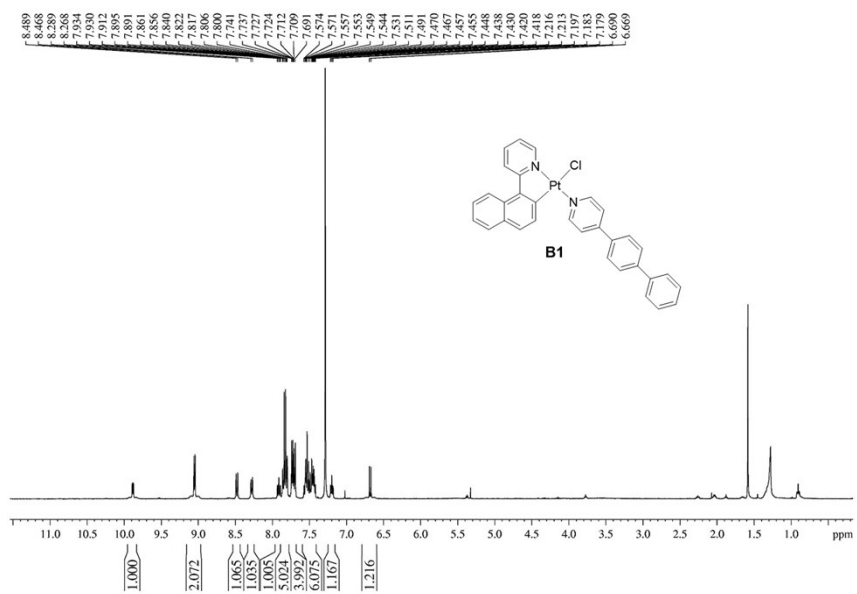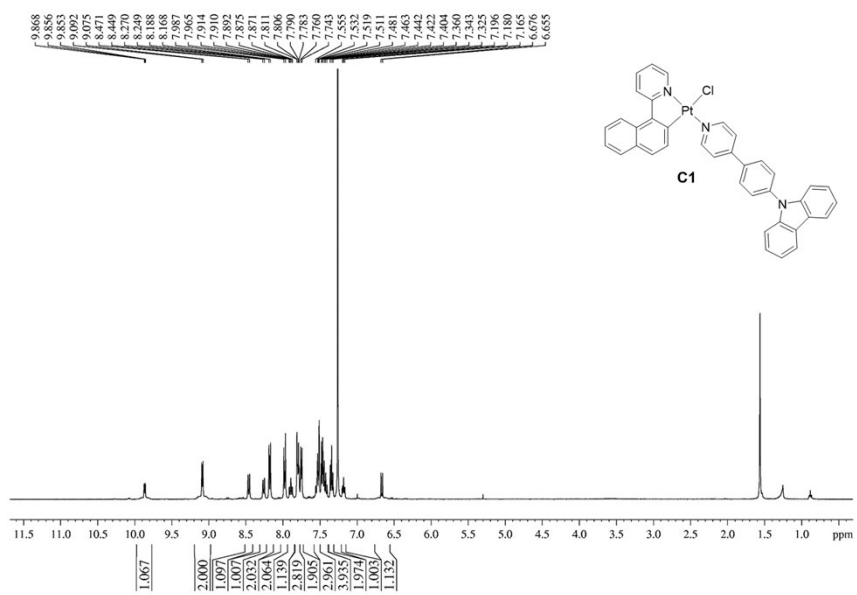

Electronic Supplementary Information

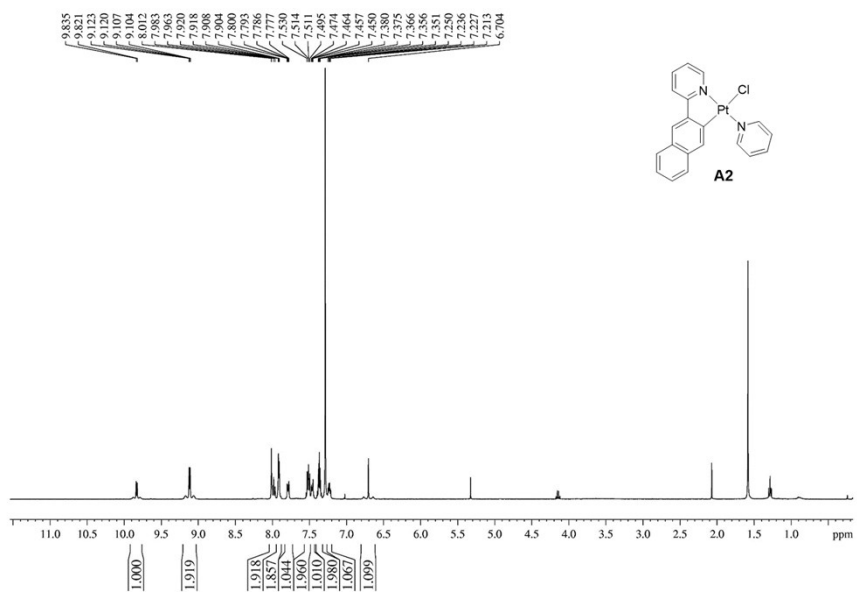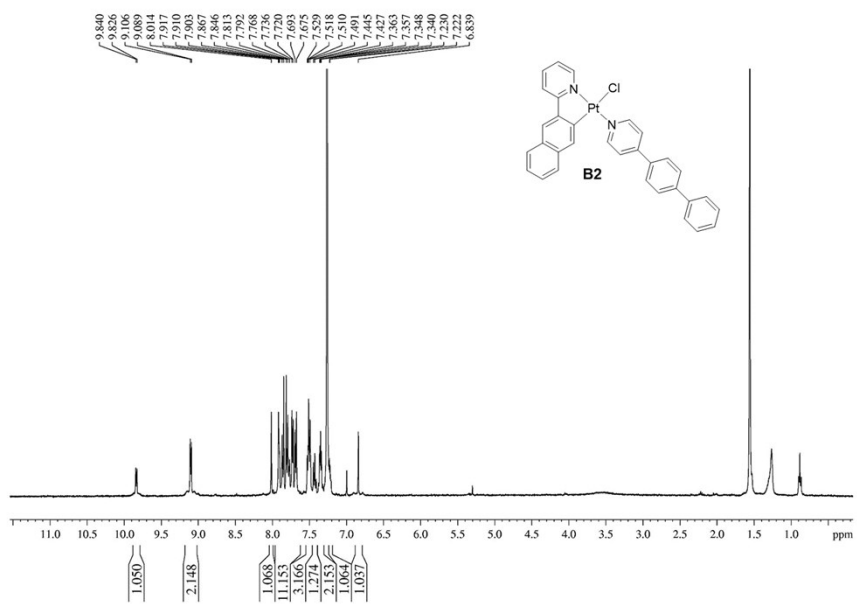

Electronic Supplementary Information

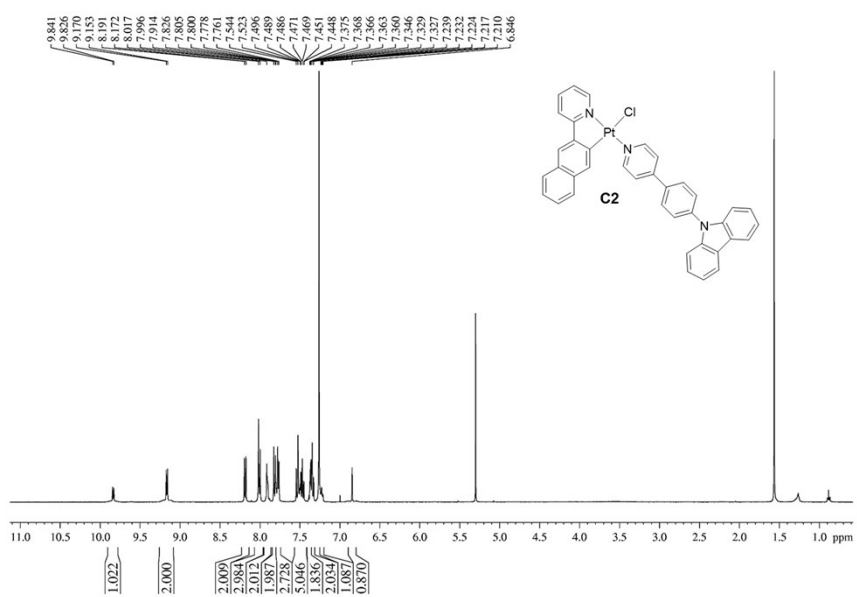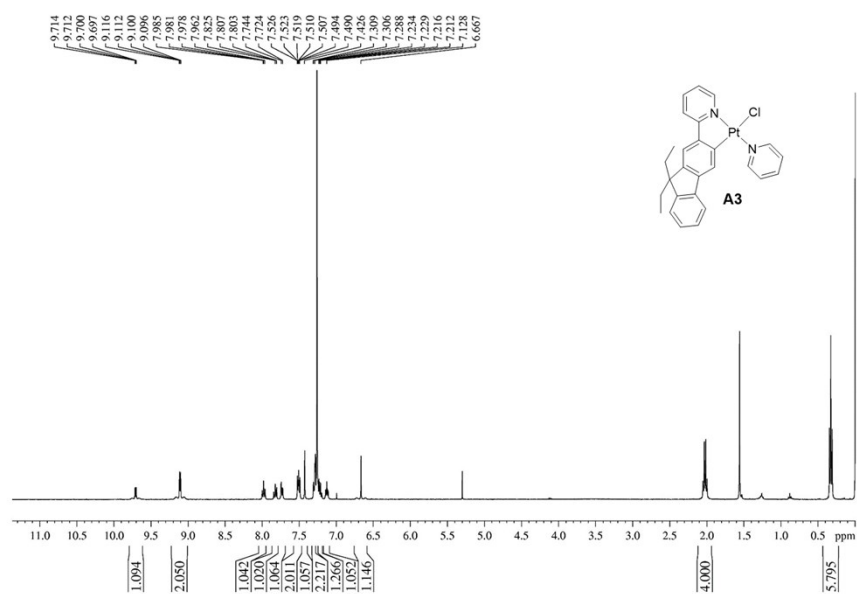



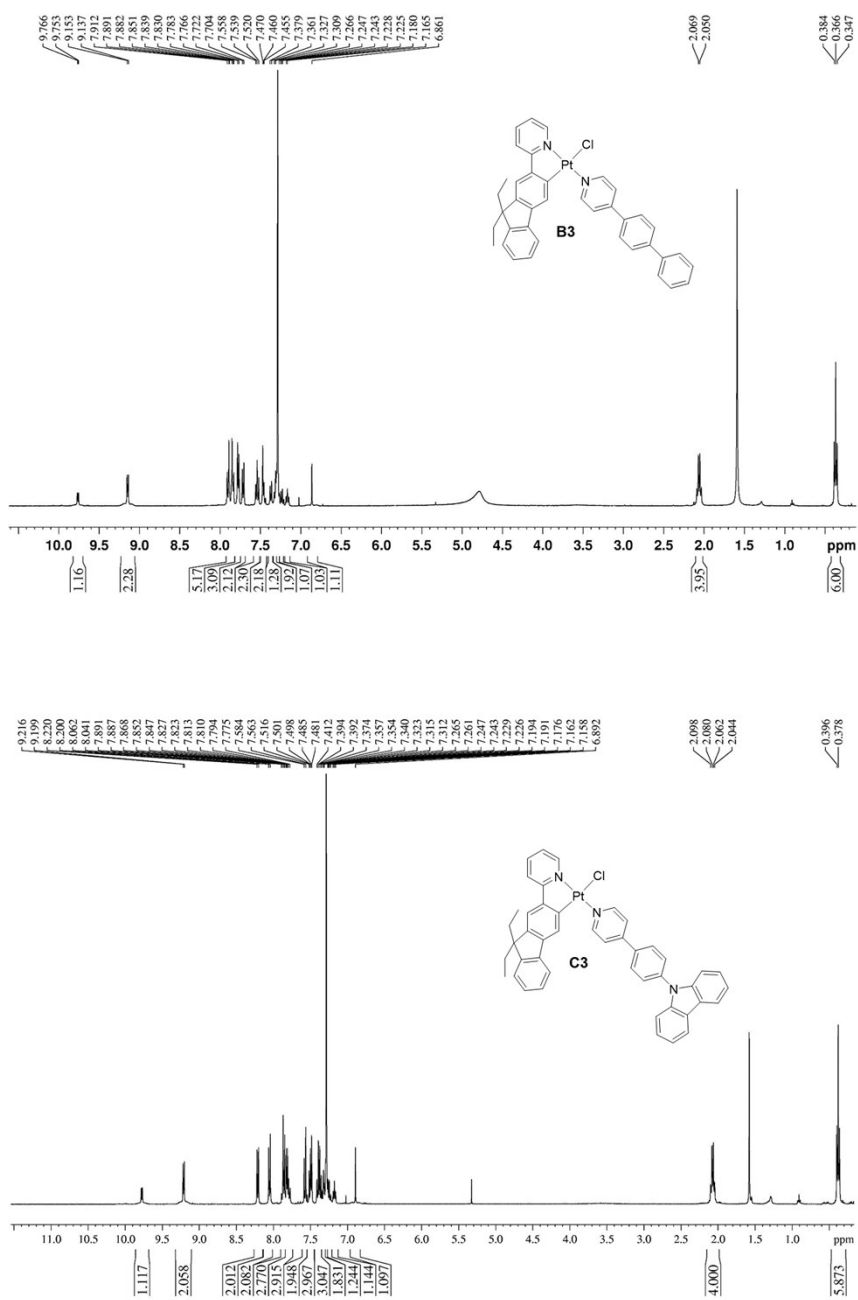

Fig. S1  $^1\text{H}$  NMR spectra for these  $\text{Pt}^{\text{II}}(\text{C}^{\wedge}\text{N})(\text{N-donor ligand})\text{Cl}$ -type complexes.

Electronic Supplementary Information

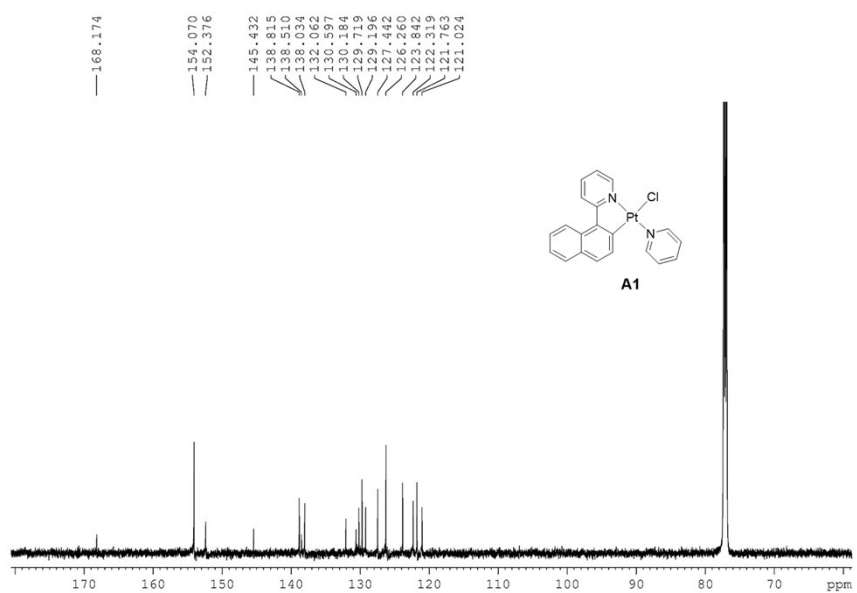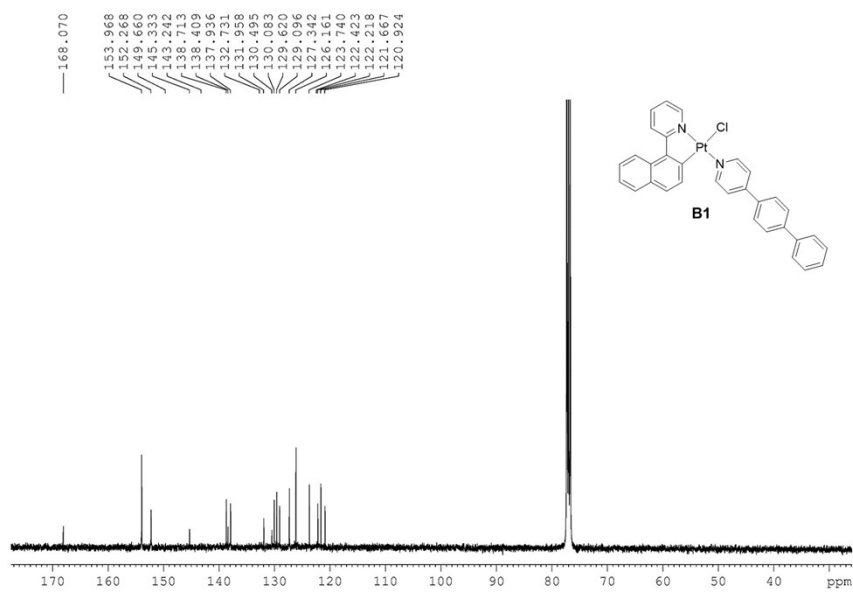

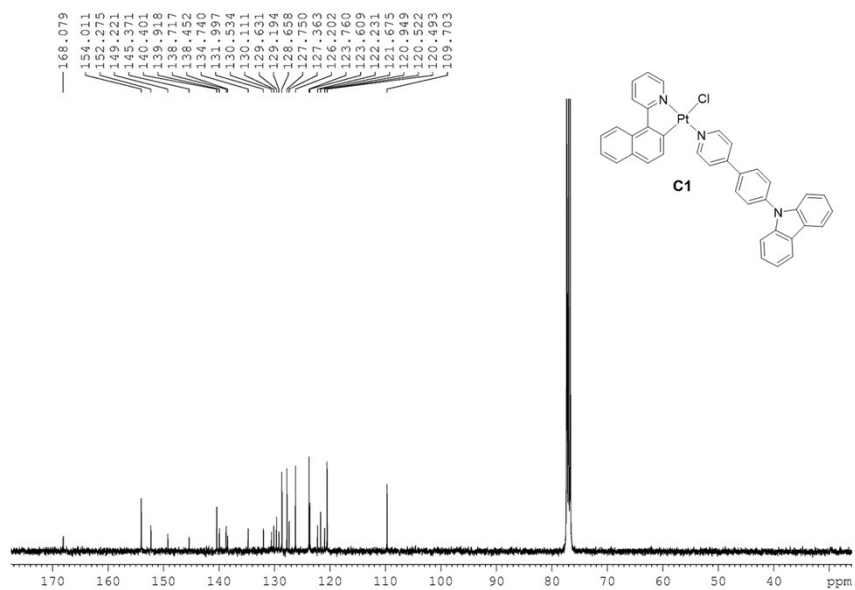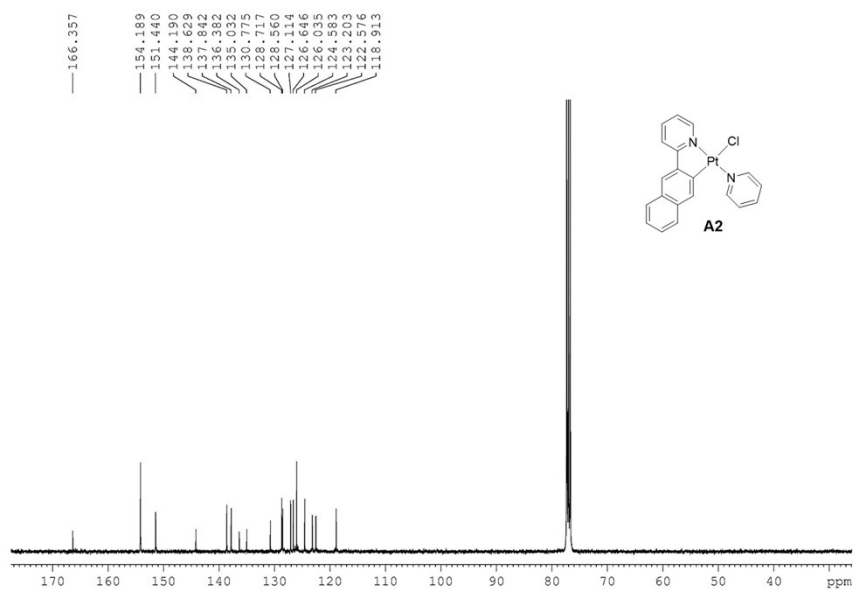

Electronic Supplementary Information

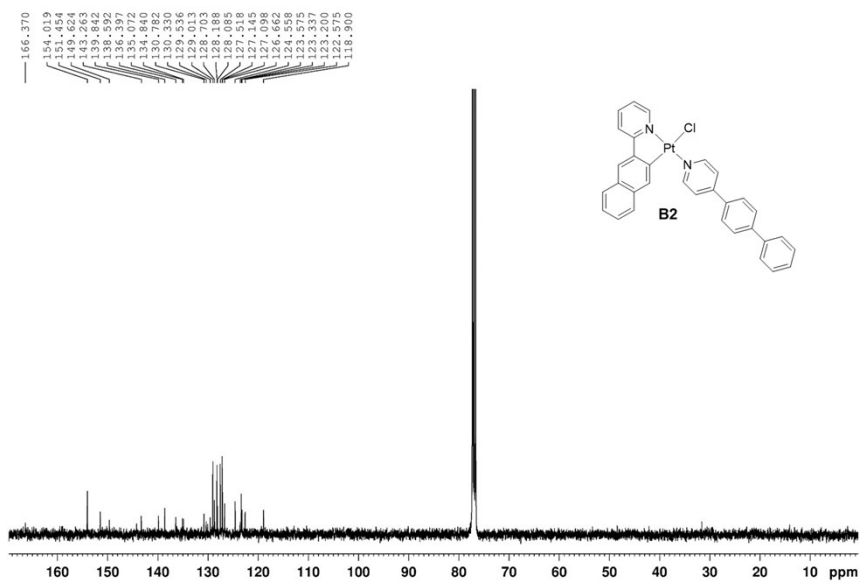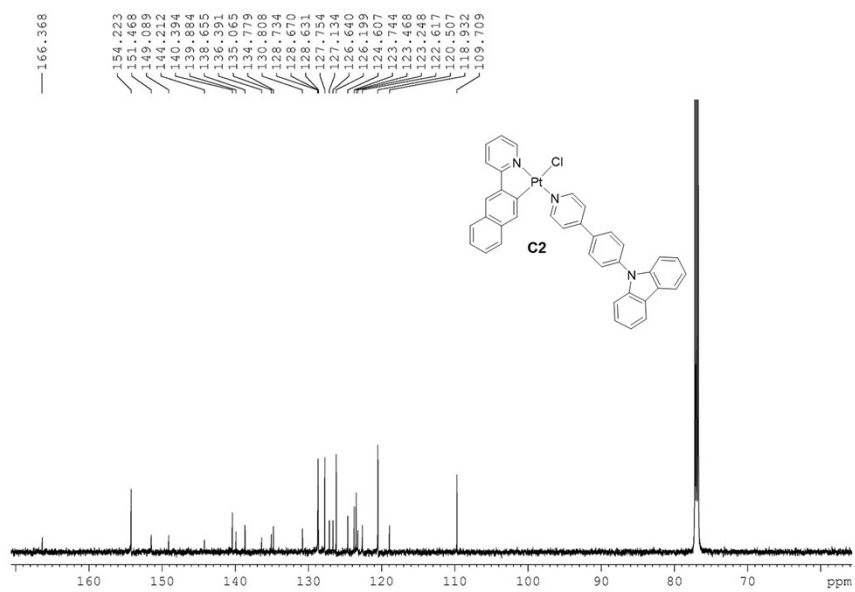

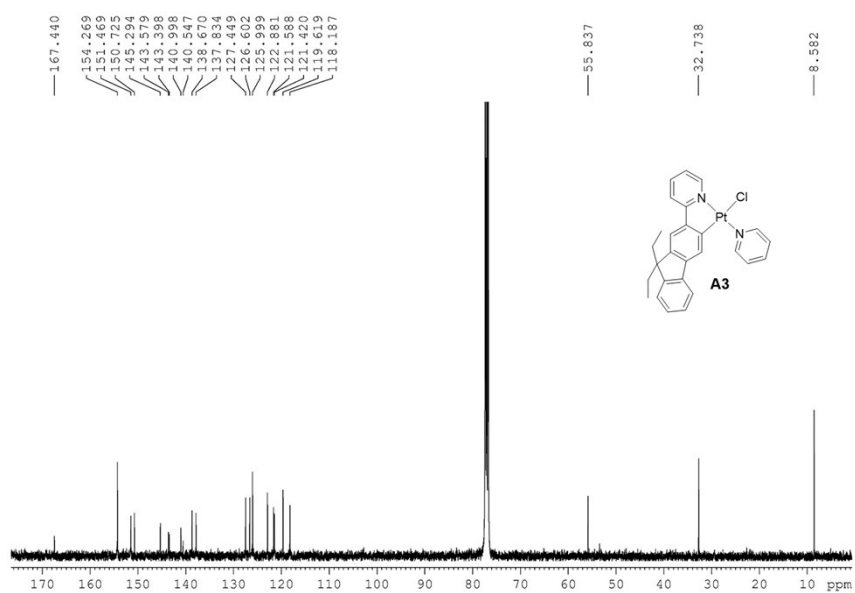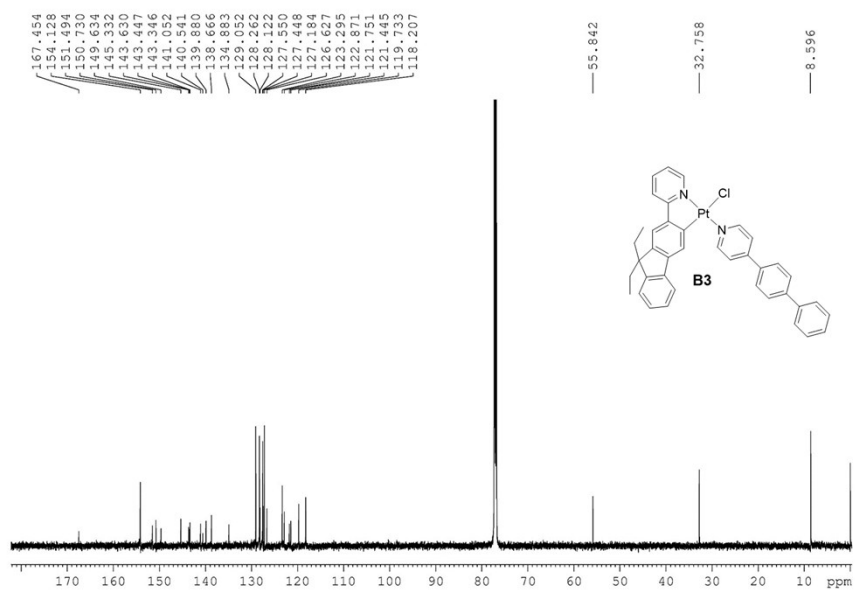

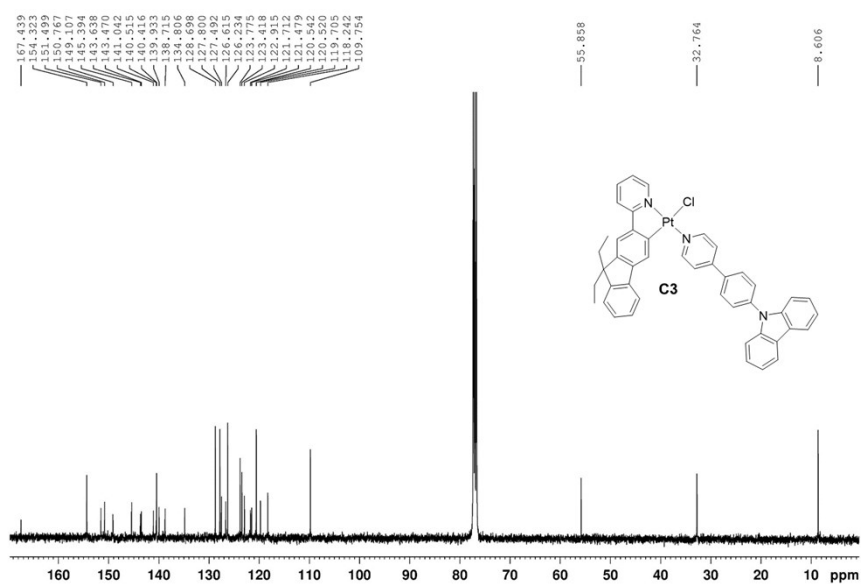

Fig. S2  $^{13}\text{C}$  NMR spectra for these  $\text{Pt}^{\text{II}}(\text{C}^{\wedge}\text{N})(\text{N-donor ligand})\text{Cl}$ -type complexes.

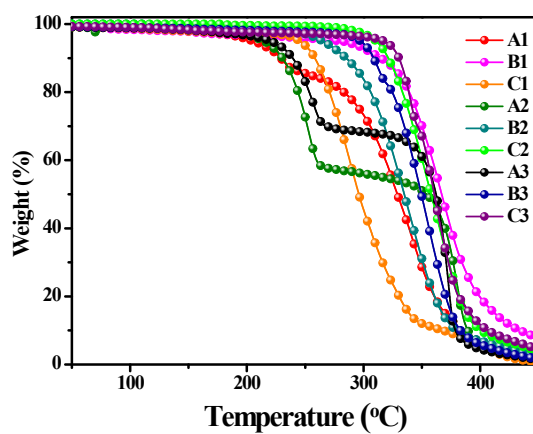

Fig. S3 The TGA curves for these  $\text{Pt}^{\text{II}}(\text{C}^{\wedge}\text{N})(\text{N-donor ligand})\text{Cl}$ -type complexes.

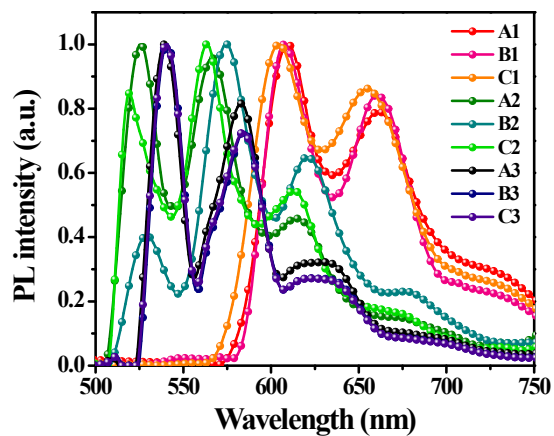

Fig. S4 Photoluminescent spectra for these Pt<sup>II</sup>(C<sup>N</sup>)(N-donor ligand)Cl-type complexes at 77K.

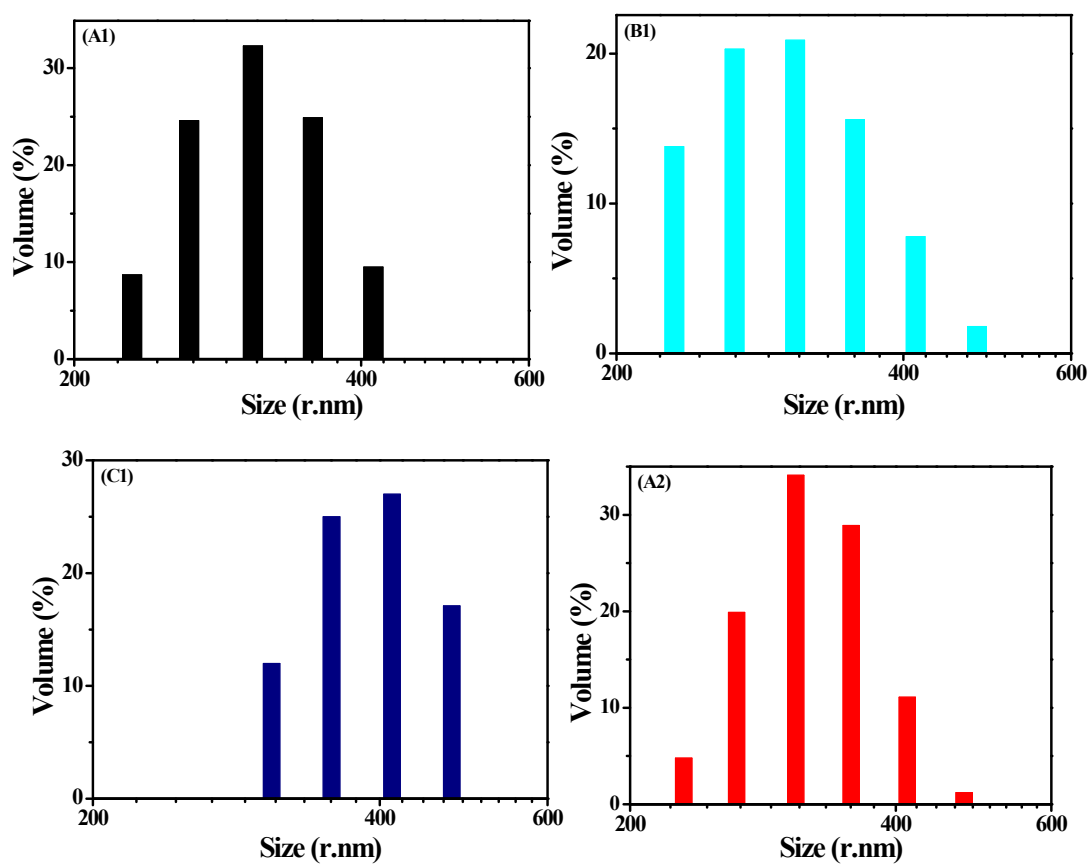

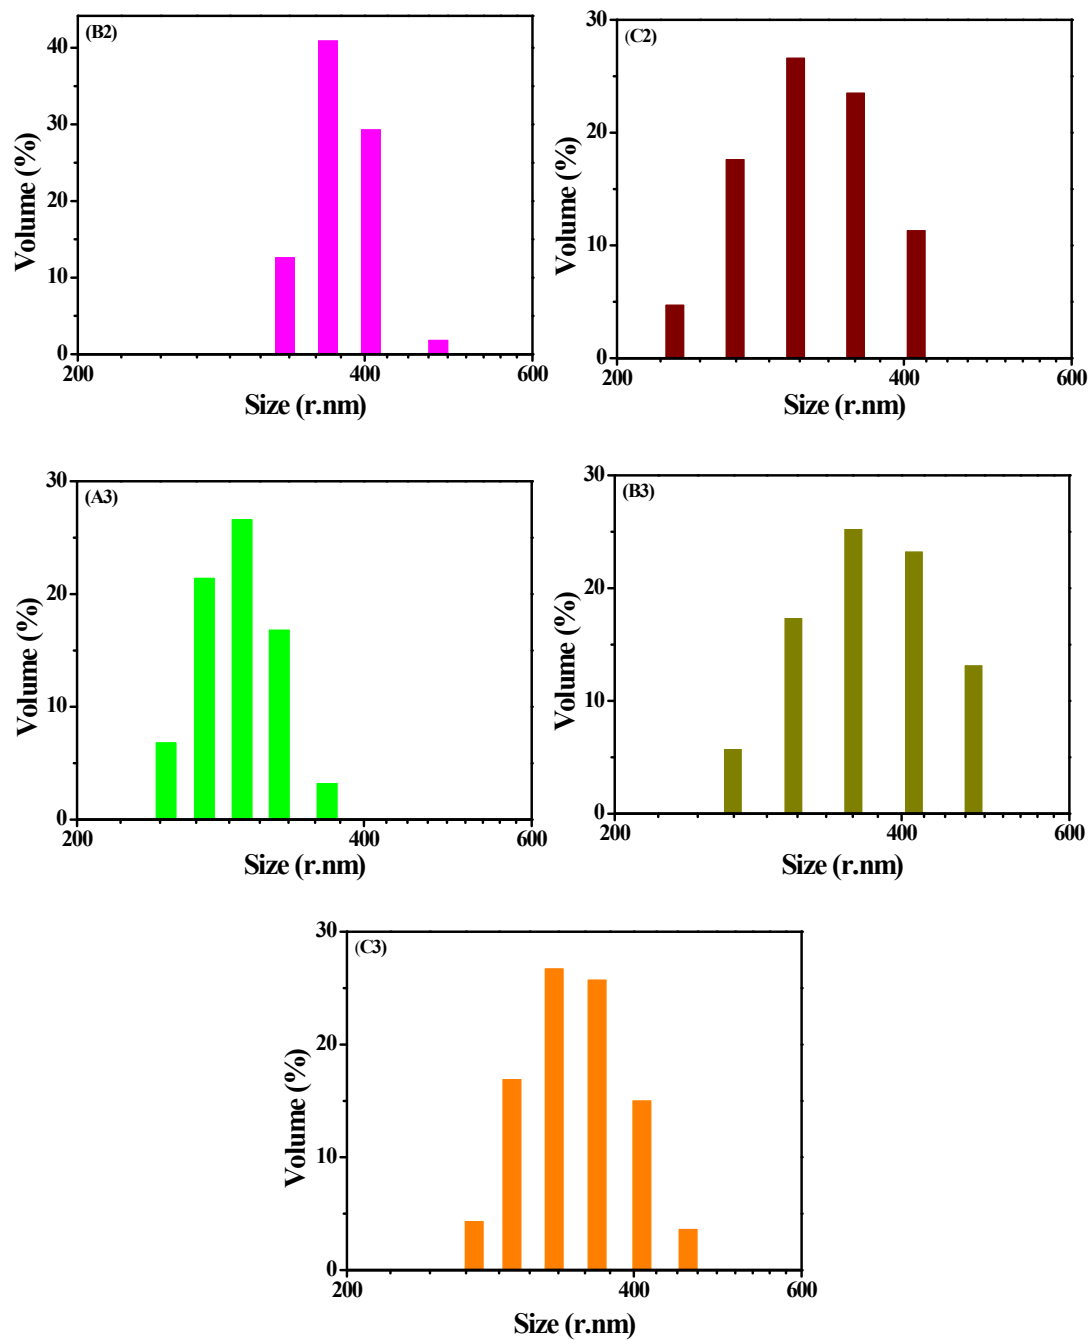

Fig. S5 Particle size distribution of these Pt<sup>II</sup>(C<sup>N</sup>)(N-donor ligand)Cl-type obtained from the THF : H<sub>2</sub>O mixture at  $f_w^c$ .



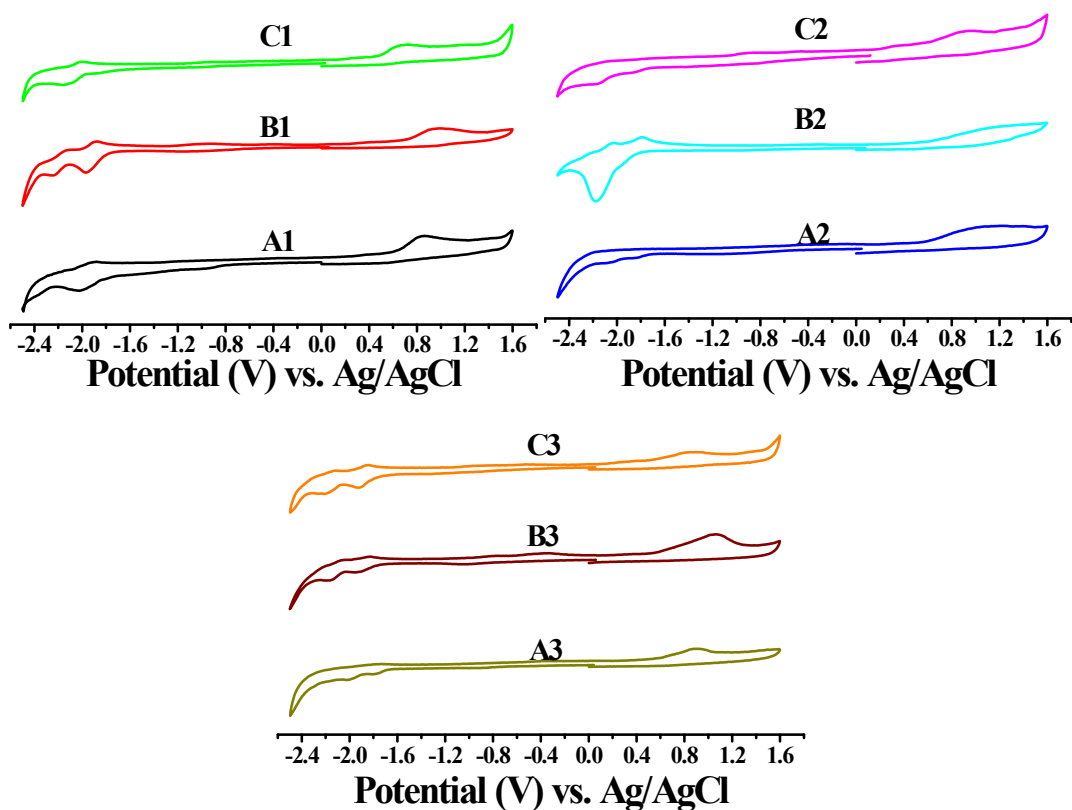

Fig. S6 CV curves for A1, B1, C1, A2, B2, C2, A3, B3 and C3

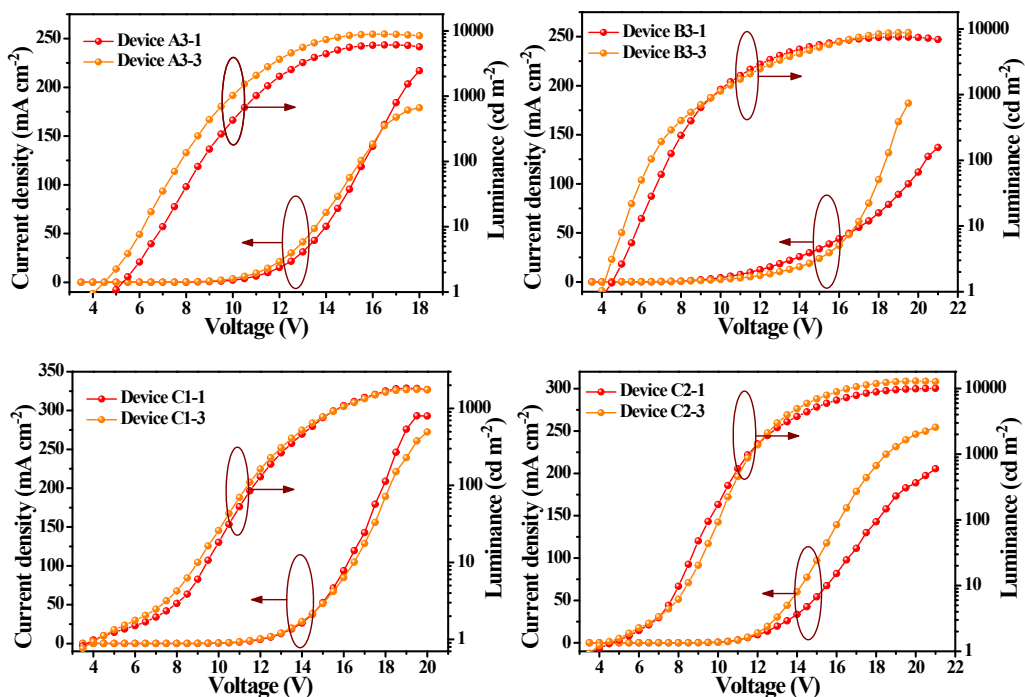

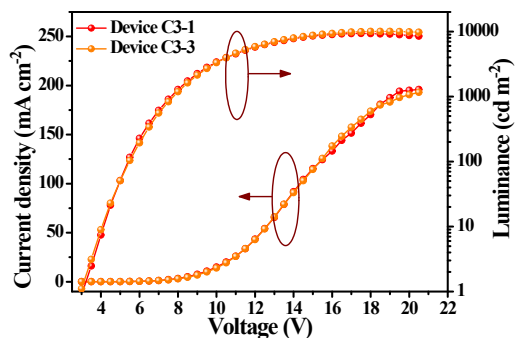

Fig. S7 Current density–voltage–luminance (J–V–L) relationships of the OLEDs.

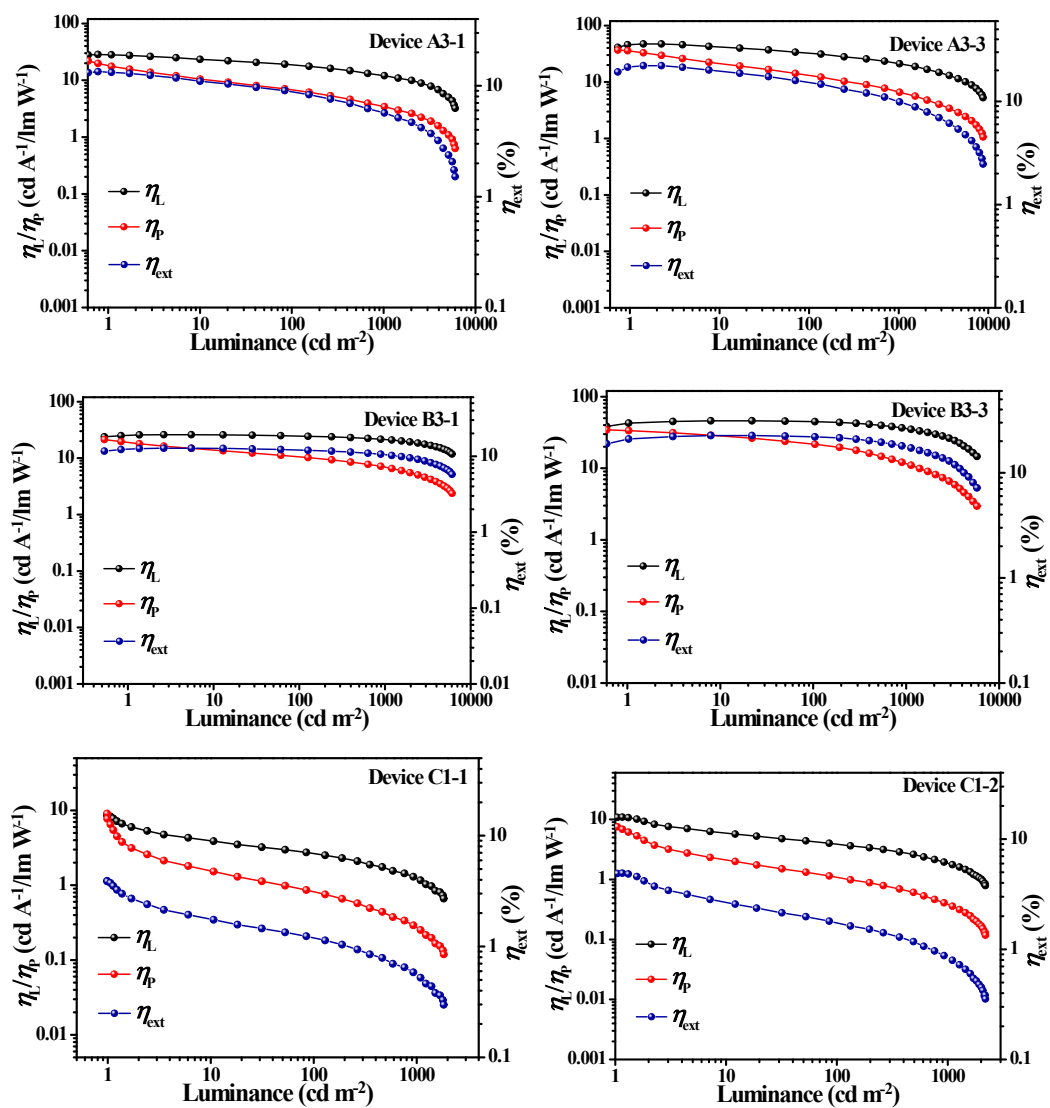

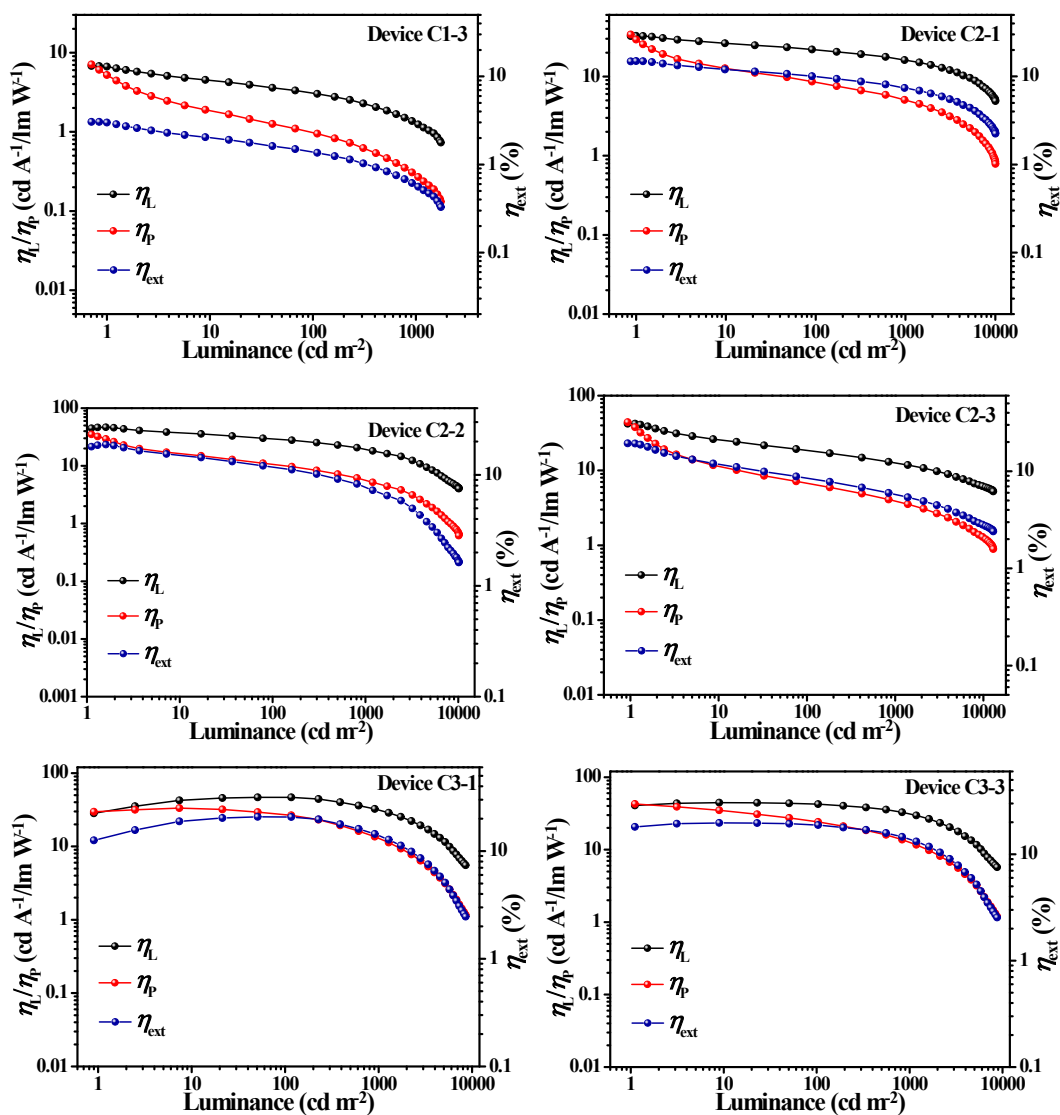

Fig. S8 EL efficiencies vs. luminance curves for the OLEDs.

## References

- 1 Nunez, A. Sanchez, C. Burgos, J. Alvarez-Builla, *Tetrahedron*, 2004, **60**, 6217-6224.
- 2 X. M. Yu, G. J. Zhou, C. S. Lam, W. Y. Wong, X. L. Zhu, J. X. Sun, M. Wong, H. S. Kwok, J. *Organomet. Chem.*, 2008, **693**, 1518-1527.
- 3 O. Kobayashi, D. Uraguchi, T. Yamakawa, *Org. Lett.*, 2009, **11**, 2679-2682.
- 4 K. Leduskrasts, A. Kinens, E. Suna, *Chem. Commun.*, 2019, **55**, 12663-12666.
